# Supplementary material
Source: publisher figshare collection journal article supplement (https://gsajournals.figshare.com/ndownloader/files/14645219)
Supplement: Supplementary file 1 [file 14645219]

**Table S5. Time of appearance of U4-cs1-suppressor strains with mutations in different genes**

| **Days at 18°C** | **U4** | ***PRP8*** | ***SAD1*** | ***BRR2*** | ***PRP6*** | ***PRP31*** | ***SNU114*** | **U6** | **None** | **Total** |
| --- | --- | --- | --- | --- | --- | --- | --- | --- | --- | --- |
| 7 | 1 |  |  |  |  |  |  |  |  | 1 |
| 13 | 2 |  |  |  |  |  |  |  |  | 2 |
| 14 | 3 | 2 |  |  |  |  |  |  |  | 5 |
| 17 | 3 | 1 | 2 |  |  |  |  |  |  | 6 |
| 19 | 1 | 1 | 3 |  |  |  |  |  |  | 5 |
| 21 |  | 2 | 4 | 2 | 1 | 1 |  |  |  | 10 |
| 24 |  | 2 | 5 | 1 | 1 |  | 1 |  |  | 10 |
| 32 |  | 5 | 1 | 2 |  |  | 1 | 1 |  | 10 |
| 40 |  | 2 | 2 |  |  |  |  |  | 1 | 5 |
| 45 |  | 1 |  | 1 |  |  |  |  | 5 | 7 |
| 54 |  |  | 1 |  |  |  |  |  | 6 | 7 |
| 64 |  |  |  |  |  |  |  |  | 4 | 4 |
| **Total strains** | 10 | 16 | 18 | 6 | 2 | 1 | 2 | 1 | 16 | 72 |
